# Supplementary material for: Effect of oval foramen restriction and premature contraction of the arterial catheter on right heart function of fetuses and infants
Source: PeerJ. 2023 Jan 4;11:e14702. doi: 10.7717/peerj.14702 (PMC9825053; doi:10.7717/peerj.14702)
Supplement: Supplemental Information 1 [file peerj-11-14702-s001.xlsx]

## Sheet: GroupA
					before birth		after birth
	ID	name	Pregnant woman age	Fetal gestational weeks	Group A-TAPSE	Group A-Tei index	Group A-TAPSE	Group A-Tei index	Birth examination days
1	1026531600	杨亚超	26	29	8.9	0.35	14.2	0.37	92
2	869788800	孔祥丽	34	33	9.4	0.38	14.6	0.34	93
3	990798600	刘梦宇	21	35	9.1	0.42	13.9	0.39	94
4	1008731200	段小雪	33	28	8.8	0.33	13.5	0.36	91
5	959346300	王云鹤	35	34	9.3	0.3	14.7	0.41	89
6	916583000	王佳	27	35	10.2	0.38	13.9	0.4	95
7	997621300	孙晓静	31	35	8.6	0.35	13.6	0.38	93
8	988448500	代亚萍	33	37	8.8	0.39	13.8	0.41	93
9	979282400	张雪云	30	31	9.7	0.4	13.9	0.39	92
10	1001678300	王春艳	28	33	8.5	0.33	14.1	0.36	90
11	982537000	孙哲	31	29	9.9	0.37	13.5	0.37	94
12	1025056300	王宇花	34	31	9.7	0.41	14.4	0.41	93
13	917981400	刘晓丹	23	33	9.9	0.34	14.6	0.35	94
14	992212700	杨志茹	30	35	8.8	0.31	14.2	0.38	92
15	982204200	郝素萍	24	30	9.6	0.35	13.7	0.4	90
16	1024265300	张晓亚	23	29	9.7	0.38	13.5	0.38	96
17	983057800	李璟	35	29	8.5	0.4	14.6	0.38	93
18	923831400	刘冬梅	27	33	8.7	0.35	14.5	0.41	95
19	833432900	葛鑫羽	33	31	9	0.31	14.6	0.39	90
20	999401500	郑文贤	27	34	9.3	0.34	14.3	0.37	89
21	986764200	王建平	34	32	9.8	0.39	14.6	0.39	90
22	968799600	吴宝鹏	23	32	9.8	0.37	13.8	0.42	93
23	872559600	张晶	33	34	8.6	0.32	14.3	0.36	92
24	846848100	李植燕	21	30	8.9	0.37	14.5	0.39	92
25	1001217000	王亚茹	29	33	9	0.33	14.3	0.36	95
26	853821700	刘茜	36	31	8.7	0.35	14.4	0.37	94
27	992927500	王春花	28	29	8.3	0.37	14.4	0.41	93
28	930196300	孙鑫	23	36	9.3	0.36	14.5	0.38	92
29	968091200	柳青华	25	39	8.6	0.37	13.6	0.4	94
30	917733900	蒋丽芬	24	28	9.8	0.33	14.2	0.36	93
31	930498400	盛守娜	31	34	9.8	0.34	13.5	0.42	90
32	980670900	高梓萱	22	31	9.5	0.32	13.3	0.38	91
33	992963300	陈绍敏	35	33	8.9	0.38	13.5	0.36	90
34	888542600	段文新	34	31	9.8	0.34	14.5	0.34	88
35	993506800	王君	31	30	8.2	0.34	14.4	0.35	93
36	973757900	霍萌	27	33	9.7	0.33	14.5	0.36	93
37	982532100	刘艳飞	30	35	9.5	0.36	14.2	0.38	92
38	962533300	周富佳	23	34	8.8	0.35	14.5	0.36	90
39	919009600	王丽萍	28	34	9	0.32	14.3	0.35	92
40	977134300	王艳云	26	30	8.7	0.33	14.5	0.37	93
41	928267500	秦萌华	31	31	8.5	0.35	14.3	0.39	93
42	875275900	胡丽娜	23	33	9	0.33	14.5	0.4	90
43	994904700	王倩	25	30	9.9	0.38	14.4	0.38	91
44	994053000	郭俊琦	27	29	9.8	0.32	14	0.36	93
45	920964300	王燕	35	37	9.2	0.38	14.3	0.41	90
46	965863400	刘媛	38	39	8.7	0.33	14.1	0.34	93
47	976154900	程琛	27	37	9.1	0.34	14.6	0.37	92
48	1004914300	李丹	30	31	9.9	0.35	13.6	0.38	93
49	964613400	张燕霞	21	34	9.1	0.38	14.7	0.39	90
50	968721000	付慧	34	29	8.8	0.31	13.5	0.36	94
51	965459300	赵海洋	32	28	9.1	0.37	13.7	0.39	93
52	999160800	李淑慧	34	30	9.4	0.33	13.6	0.36	90
53	910500200	刘福红	35	32	9.7	0.37	14.1	0.38	93
54	993258400	刘海英	37	34	8.8	0.34	14.5	0.37	90
55	918264300	强安时	23	32	9.5	0.35	14.3	0.39	90
56	897407400	周兴崇	34	33	9.8	0.37	14.3	0.38	93
57	911683500	靳玉凤	38	33	8.8	0.35	14.5	0.39	92
58	1097856200	于晓丽	24	34	9.7	0.33	14.7	0.37	90
59	920318200	崔翠翠	26	30	9.1	0.4	13.8	0.39	91
60	1072310800	潘春霞	34	31	8.5	0.37	13.7	0.38	93
61	954309600	路璐	27	33	9.9	0.31	14.1	0.37	92
62	954271900	张桂琴	31	31	9.2	0.41	13.9	0.38	93
63	962589100	王永霞	25	30	8.5	0.35	14.5	0.36	93
64	963792100	王丹丹	34	33	8.7	0.37	14.7	0.39	91
65	914483000	程林	23	31	9.8	0.35	14.3	0.38	90
66	955997600	李红霞	34	30	9.3	0.33	14.5	0.36	93
67	1032079500	吴凯丽	35	35	9.2	0.32	13.6	0.38	92
68	955562600	赵晨晓	36	30	8.8	0.37	14.3	0.37	93
69	1008032300	陈晓宁	33	34	8.6	0.32	14.3	0.35	90
70	952795500	李丽楠	34	33	9.8	0.33	14.2	0.39	93
71	931821300	赵超慧	23	33	9.1	0.37	14.5	0.42	92
72	918466600	李硕	35	35	8.3	0.35	14.4	0.38	90
73	955486900	苗清	32	31	9.1	0.34	14.5	0.38	92
74	885205900	李子柠	24	35	9.3	0.31	13.8	0.36	93
75	964149400	田婧茹	25	36	9.5	0.39	14.5	0.38	90
76	963218300	刘嫒	31	35	9.5	0.32	13.6	0.36	92
77	953499300	赵伟	25	33	8.7	0.35	14.2	0.38	92
78	973697600	宋鑫艳	27	35	8.5	0.33	14.3	0.36	93
79	934740900	吴建桃	23	30	9.8	0.31	14.5	0.38	92
80	959844400	张燕琦	25	33	9.7	0.36	14.4	0.37	90
81	969683900	高鸿宇	23	31	8.5	0.36	14.5	0.39	91
82	983790800	朱继虹	33	29	8.4	0.32	14.7	0.37	92
83	982029300	李志丹	24	33	9	0.38	14.3	0.4	90
84	904330800	宋先丽	25	30	9.1	0.32	14.5	0.36	92
85	945270500	李燕京	31	29	8.8	0.37	14.3	0.38	93
86	1009631700	胡美美	24	31	8.4	0.39	14.5	0.39	90
87	960606700	王慧美	30	33	9.6	0.36	14.6	0.38	94
88	847978600	刘丽娜	34	34	8.5	0.4	13.9	0.41	92
89	1007104100	赵帅	26	32	8.4	0.34	14.4	0.36	93
90	976102600	赵士翠	21	34	9.7	0.32	14.2	0.37	93
91	978079100	艾琳琳	23	33	9.9	0.33	14.3	0.38	94
92	939567800	赵雪飞	34	34	8.9	0.39	14.5	0.4	92
93	921743300	王丽园	25	35	8.1	0.32	14.3	0.36	93
94	946353400	曹校珍	27	37	9.4	0.37	14.5	0.39	93
95	960385700	韦荣	31	32	9.8	0.35	14.3	0.39	92
96	918295100	牛亚君	25	36	8.3	0.37	14.2	0.35	90
97	947238900	张荣婷	28	30	9.5	0.36	14.5	0.38	93
98	969598900	刘晓燕	34	31	8.8	0.35	14.3	0.36	92
			28.9388	32.449	9.14184	0.352041	14.2143	0.378163	92.0102

## Sheet: GroupB
					before birth			after birth
	ID	name	Pregnant woman age	Fetal gestational weeks	Group B-RV/LV	Group B-TAPSE	Group B-Tei index	Group B-RV/LV	Group B-TAPSE	Group B-Tei index	Birth examination days
1	871637400	王洁	34	34	1.47	7.8	0.41	0.93	14.1	0.35	94
2	936694000	李向宁	27	31	1.53	7.6	0.46	0.95	14.5	0.38	90
3	967072500	郭海霞	25	28	1.34	8.3	0.37	0.96	13.6	0.37	93
4	1003073400	张秀萍	35	33	1.69	7.2	0.47	0.93	13.8	0.4	90
5	998488600	景翠萍	33	34	1.38	8.2	0.42	0.98	14.2	0.35	89
6	1029433200	许泽超	26	35	1.82	7.4	0.51	1.17	11.7	0.47	90
7	982861300	郑洁	22	33	1.53	7.4	0.43	0.95	1.43	0.36	94
8	928930800	贾晓旭	37	31	1.44	8.5	0.37	0.95	13.3	0.34	95
9	918273800	韩美茹	25	29	1.82	6.7	0.54	1.03	12.1	0.46	94
10	882896600	王晓娜	31	30	1.53	7.5	0.44	0.94	14.6	0.35	94
11	838841000	于丽娜	23	32	1.62	7.3	0.45	0.95	14.2	0.38	90
12	936630400	梁才云	30	34	1.28	9.1	0.38	0.96	13.9	0.36	96
13	1002976400	闫佳欣	24	35	1.4	7.4	0.41	0.93	13.5	0.35	93
14	9503846400	田敏	29	35	1.35	8.1	0.36	0.95	14.2	0.4	93
15	1002998300	李姝颖	27	30	1.39	8.3	0.45	0.93	14.5	0.38	90
16	1002989300	闫恩慧	31	28	1.45	7.6	0.42	0.96	14.3	0.39	89
17	1012452100	方慧	30	34	1.33	8.5	0.41	0.93	14.7	0.37	94
18	954311600	吴函芸	26	33	1.86	7.1	0.49	1.21	11.3	0.5	95
19	889566000	王成霞	33	32	1.32	7.9	0.41	0.95	13.8	0.42	93
20	972642800	王伞	25	33	1.28	8.7	0.39	0.95	14.2	0.36	92
21	936211500	杜聪璇	31	35	1.42	7.6	0.42	0.96	14.3	0.39	90
22	920438000	张建华	38	37	1.31	9	0.41	0.97	14.5	0.36	92
23	920901100	米兰芳	33	35	1.52	7.5	0.47	0.95	14.7	0.37	93
24	1022766000	张学琴	23	36	1.48	7.5	0.4	0.97	14.4	0.39	92
25	885800700	肖思	34	32	1.39	7.5	0.38	0.98	14.5	0.36	95
26	991314000	孙晓丽	31	30	1.31	8.3	0.4	0.93	13.6	0.4	93
27	1015058800	贺晓云	27	29	1.33	8.5	0.42	0.95	14.2	0.41	95
28	1005813200	卜娇颖	31	34	1.26	9.7	0.38	0.97	13.5	0.4	92
29	995948700	李小佩	24	35	1.71	7.3	0.49	0.97	13.5	0.36	94
30	984402400	李雪萍	36	32	1.66	7.3	0.46	0.91	13.3	0.38	93
31	1012268100	刘敏	34	34	1.88	6.9	0.56	1.2	10.9	0.52	90
32	1034776200	温芳	22	36	1.43	8.2	0.41	0.95	14.4	0.35	91
33	992453000	吕亚平	35	34	1.63	7.6	0.46	0.95	14.2	0.36	90
34	994387200	杜慧敏	29	37	1.58	7.9	0.42	0.94	14.5	0.38	91
35	924652700	张岚	31	36	1.37	8.7	0.39	0.99	14.3	0.39	93
36	931346400	刘园	33	35	1.44	7.8	0.44	0.98	14.1	0.35	89
37	855516700	池雪婷	28	33	1.35	9	0.43	0.96	14.5	0.37	95
38	1015035200	周雁娇	30	34	1.83	6.6	0.54	1.12	12.1	0.48	90
39	1020089000	张炜婕	24	34	1.47	7.6	0.49	0.94	14.5	0.36	89
40	965240300	沈秀丽	33	31	1.29	8.9	0.35	0.95	14.4	0.38	92
41	888914100	李亚茹	34	30	1.51	7.9	0.53	0.96	14.3	0.41	93
42	939803300	王雪怡	25	31	1.48	7.8	0.43	0.94	13.9	0.42	95
43	922694200	于久洋	34	35	1.34	8.6	0.38	0.96	14.1	0.39	92
44	964940100	耿丽华	34	34	1.77	7.2	0.51	1.03	13.3	0.48	93
45	872016000	王晓	26	35	1.58	7.7	0.47	0.98	13.6	0.38	94
46	1010279800	张小霞	28	31	1.3	9.4	0.37	0.92	14.7	0.39	93
47	823886300	宋萍	31	33	1.78	6.9	0.49	1.17	13.5	0.46	92
48	99237400	郑丽娜	35	31	1.65	7.5	0.46	0.93	13.7	0.39	94
49	957155500	成雪君	28	29	1.98	6.2	0.61	1.25	10.7	0.57	93
50	994580000	席慧娜	34	35	1.34	8.4	0.35	0.97	14.1	0.38	90
51	1005747400	张蒙	31	33	1.46	7.6	0.42	0.95	14.5	0.37	91
52	937369800	蒋东旭	38	34	1.58	7.4	0.45	0.94	14.3	0.39	90
53	992873100	齐雪颖	29	31	1.79	6.9	0.53	1.02	12.9	0.47	92
54	906866200	宋岳	34	34	1.82	7	0.58	1.12	12.3	0.48	94
55	998613700	秦楠	24	31	1.55	7.4	0.46	0.96	14.7	0.37	93
56	1034335100	杨笑茹	28	33	1.64	7.1	0.49	0.98	13.8	0.39	92
57	949488900	张雪君	31	34	1.54	7.9	0.45	0.95	13.7	0.37	89
58	1021606100	王俊平	26	30	1.33	8.7	0.38	0.94	14.1	0.37	92
59	1022646500	王海艳	33	29	1.29	9.1	0.33	0.93	13.9	0.39	93
60	904758300	尹风荣	39	33	1.47	7.7	0.43	0.95	14.5	0.36	95
61	842421700	刘颖	29	35	1.85	6.8	0.63	1.22	14.5	0.39	90
62	992826500	张利利	27	33	1.56	7.9	0.46	0.92	14.3	0.38	91
63	869212900	吉晓彬	32	34	1.47	7.8	0.43	0.96	14.5	0.36	93
64	1012702900	郝燕飞	36	32	1.55	7.6	0.45	0.94	13.6	0.38	93
65	849265000	王丽莎	33	33	1.69	7.3	0.45	0.96	13.8	0.36	94
66	1005989900	董晓丽	29	34	1.85	6.9	0.58	1.09	12.7	0.49	92
67	964587400	马新蕊	34	31	1.68	7.7	0.47	0.95	14.2	0.39	93
68	862553500	郝圣琦	25	34	1.43	8.2	0.4	0.96	14	0.42	90
69	989275900	张楠	33	35	1.67	7.6	0.5	0.97	14.4	0.38	92
70	1019224800	李一青	28	33	1.45	7.8	0.43	0.95	14.5	0.38	93
71	1091565400	王晓娇	34	34	1.59	7.5	0.46	0.96	13.8	0.36	95
72	1008509800	许娜	25	34	1.68	7.4	0.46	0.95	14.5	0.38	92
73	993736900	韩东早	39	32	1.52	7.8	0.43	0.93	13.6	0.36	90
74	988073500	周进霞	34	32	1.62	7.1	0.45	0.97	14.2	0.38	91
75	993138100	赵炜	34	31	1.79	7.3	0.51	0.93	14.3	0.36	92
76	990449900	苏学芳	28	32	1.43	7.8	0.43	0.93	14.5	0.38	91
77	940449600	刘倩	36	34	1.67	7.2	0.46	0.91	14.4	0.37	92
78	815973900	刘晓翠	31	32	1.58	7.7	0.43	0.95	14.3	0.39	91
79	1001927100	李玲	24	34	1.74	6.7	0.54	0.92	14.7	0.37	90
80	925303700	白雪	31	33	1.46	7.7	0.41	0.98	14.3	0.4	94
81	1001787300	王登学	34	29	1.58	7.4	0.44	0.92	14.5	0.36	92
82	1029572700	李小婷	26	35	1.66	7.5	0.48	0.98	14	0.38	93
83	949592300	刘雅轩	37	34	1.53	7.9	0.43	0.96	14.5	0.39	93
84	987415700	李玲慧	23	33	1.61	7.2	0.43	0.98	14.6	0.38	96
85	1003797900	张晶	29	33	1.34	8.2	0.39	0.93	13.9	0.41	92
86	925159900	王小娟	36	31	1.91	6.4	0.58	1.26	9.7	0.52	93
87	1008315200	刘婷婷	27	33	1.27	8.8	0.34	0.92	14.1	0.37	93
88	983492600	俞晶珊	34	32	1.65	7.7	0.47	0.98	14.3	0.38	92
89	990350700	薛志瑛	36	35	1.48	7.7	0.42	0.96	14.5	0.4	93
90	890036100	李海坤	32	33	1.53	7.8	0.43	0.97	14.3	0.36	91
91	891925600	李慧静	28	31	1.49	7.8	0.42	0.96	14.2	0.39	92
			30.3956	32.8571	1.53868	7.74286	0.446593	0.978791	13.7432	0.392857	92.2637

## Sheet: GroupC
			Before birth			After birth
Number	Age	Gestational weeks	Group C-RV/LV	Group C-TAPSE	Group C-Tei index	Group C-RV/LV	Group C-TAPSE	Group C-Tei index	Birth examination days
1	31	33	1.45	7.4	0.43	0.97	14.3	0.36	93
2	33	35	1.42	7.6	0.42	0.92	14.5	0.35	91
3	32	29	1.73	6.5	0.49	1.14	11.5	0.46	94
4	23	37	1.69	7.2	0.46	1.1	12.4	0.45	90
5	24	33	1.38	7.2	0.44	0.98	14.2	0.34	92
6	35	33	1.78	6.3	0.51	1.21	10.4	0.48	90
7	28	35	1.53	7.1	0.39	0.98	14.4	0.35	93
8	31	29	1.44	7.3	0.45	0.95	13.8	0.34	94
9	34	28	1.81	6.2	0.64	1.28	9.7	0.61	93
10	29	38	1.52	8.3	0.42	0.94	14.6	0.35	90
11	22	29	1.62	7.1	0.49	0.95	14.1	0.39	92
12	25	37	1.28	8.2	0.39	0.93	13.9	0.36	95
13	33	35	1.4	7.8	0.43	0.93	13.5	0.35	93
14	31	35	1.35	8.3	0.45	0.95	14.2	0.4	93
15	23	37	1.39	7.7	0.45	0.93	14.5	0.38	90
16	34	29	1.45	7.5	0.36	0.96	14.2	0.39	91
17	31	34	1.32	7.7	0.4	0.93	14.7	0.35	94
18	24	36	1.92	5.4	0.68	1.41	9.3	0.62	89
19	26	33	1.33	7.6	0.41	0.95	13.7	0.4	93
20	28	34	1.28	8.1	0.35	0.96	14.3	0.35	91
21	34	32	1.42	7.9	0.42	0.96	14.8	0.39	90
22	38	31	1.31	7.8	0.48	1.01	14.1	0.36	93
23	24	33	1.52	7.1	0.49	0.95	14.7	0.37	91
24	32	35	1.46	6.9	0.45	0.97	14.2	0.4	92
25	35	32	1.79	6.1	0.58	1.15	10.7	0.57	94
26	33	39	1.31	7.4	0.42	0.93	13.6	0.38	93
27	31	35	1.33	7.6	0.41	0.95	14.1	0.41	92
28	32	36	1.26	7.8	0.39	0.97	13.9	0.34	92
29	35	30	1.73	6.2	0.6	1.13	10.4	0.56	95
30	27	29	1.36	7.9	0.38	0.91	13.3	0.38	92
31	33	28	1.82	5.7	0.68	1.31	8.7	0.61	93
32	27	30	1.45	7.6	0.43	0.98	14.2	0.36	90
33	34	32	1.61	6.9	0.46	0.99	13.2	0.38	95
34	23	34	1.42	7.5	0.41	0.92	14.5	0.38	91
35	33	32	1.72	6.6	0.57	1.18	11.8	0.51	92
36	21	33	1.42	7.6	0.41	0.98	13.8	0.35	91
37	29	33	1.35	7.8	0.42	0.97	14.2	0.36	94
38	33	35	1.83	6.1	0.62	1.24	11.2	0.52	92
39	23	30	1.46	7.2	0.44	0.95	14.3	0.34	90
40	34	31	1.3	8.2	0.38	0.96	14.6	0.38	92
41	31	33	1.53	7.4	0.43	0.95	13.7	0.41	91
42	27	31	1.72	6.9	0.51	1.08	12.4	0.48	94
43	31	30	1.34	8.5	0.39	0.91	14.1	0.36	92
44	24	33	1.46	7.1	0.58	1.03	12.5	0.51	95
45	33	31	1.56	7.5	0.56	0.98	14.1	0.38	94
46	34	30	1.29	8.3	0.38	0.92	14.7	0.39	93
47	22	37	1.78	6.1	0.69	1.25	10.5	0.58	92
48	35	30	1.42	8.2	0.38	0.93	13.9	0.39	90
49	34	34	2.03	6.2	0.66	1.42	8.6	0.62	93
50	27	33	1.35	7.9	0.41	0.98	14.2	0.37	91
51	34	33	1.44	7.8	0.43	0.95	14.3	0.38	95
52	34	35	1.58	7.2	0.49	0.98	13.4	0.43	91
53	26	39	1.53	7.9	0.46	0.95	13.8	0.38	91
54	30	35	1.6	7.1	0.52	1.12	12.1	0.48	95
55	31	36	1.7	6.7	0.58	1.22	10.5	0.58	93
56	34	35	1.52	7.6	0.48	0.98	13.7	0.37	93
57	29	33	1.73	6.2	0.64	1.19	11.3	0.55	90
58	33	35	1.33	8.5	0.38	0.95	14.1	0.37	92
59	31	36	1.31	7.9	0.35	0.89	14.6	0.39	95
60	38	33	1.82	6.1	0.67	1.25	9.4	0.59	93
61	29	31	1.29	8.2	0.34	0.96	14.5	0.39	90
62	34	29	1.56	7	0.45	0.92	14.3	0.38	91
63	24	33	1.47	7.4	0.48	0.96	14.5	0.36	93
64	31	30	1.52	7.2	0.46	0.98	13.6	0.39	91
65	29	31	1.69	6.9	0.51	0.99	12.8	0.48	94
66	35	31	1.88	7.1	0.62	1.19	10.3	0.53	94
67	33	32	1.47	8.2	0.36	0.95	14.2	0.39	90
68	28	34	1.38	8.1	0.38	0.96	14.5	0.34	92
	30.1324	32.9706	1.51853	7.31765	0.471912	1.02382	13.1632	0.422059	92.25
